## Correction

# Correction: X-ray data processing

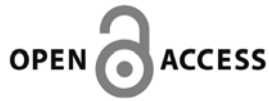

The authors of the original article above article “X-ray data processing” (*Biosci Rep* (2017) 37(5), DOI: 10.1042/BSR20170227) would like to correct the formula given on page 12 for the reliability indices  $R_{meas}$  and  $R_{rim}$ . The author declares that this correction does not change the results or conclusions of the paper. The corrected formula is presented here..

$$R_{meas} = R_{rim} = \sqrt{\sum_{hkl} \frac{N(hkl)}{(N(hkl) - 1)}} \times \frac{\sum_i |I_i(hkl) - \langle I(hkl) \rangle|}{\sum_{hkl} \sum_i I_i(hkl)}$$

Version of Record published:  
30 July 2020
